# Supplementary material for: Synthesis of carboxylate functionalized A3B and A2B2 thiaporphyrins and their application in dye-sensitized solar cells
Source: Royal Society of Chemistry journal article supplement (doi:10.1039/c4nj00373j), 2014-01-01
Supplement: c4nj00373j1.pdf [file c4nj00373j1.pdf]

## Supporting information

### **Synthesis of Carboxylate functionalized A<sub>3</sub>B and A<sub>2</sub>B<sub>2</sub> Thiaporphyrins and their application in Dye-Sensitized Solar Cells**

Sandeep B. Mane and Chen-Hsiung Hung\*

## Table of contents

1. Figure S1: ATR-FTIR spectra of neat thiaporphyrins contrasted with thiaporphyrins on  $\text{TiO}_2$  for N3S-ECA, N3S-ECN, N3S-2AOMe, and N3S-2ATPA
2.  $^1\text{H}$ ,  $^{13}\text{C}$  NMR spectra and HR-Mass Spectra for N3S-ECN, N3S-CA, N3S-2AOMe, N3S-2ATol, and N3S-2ATPA

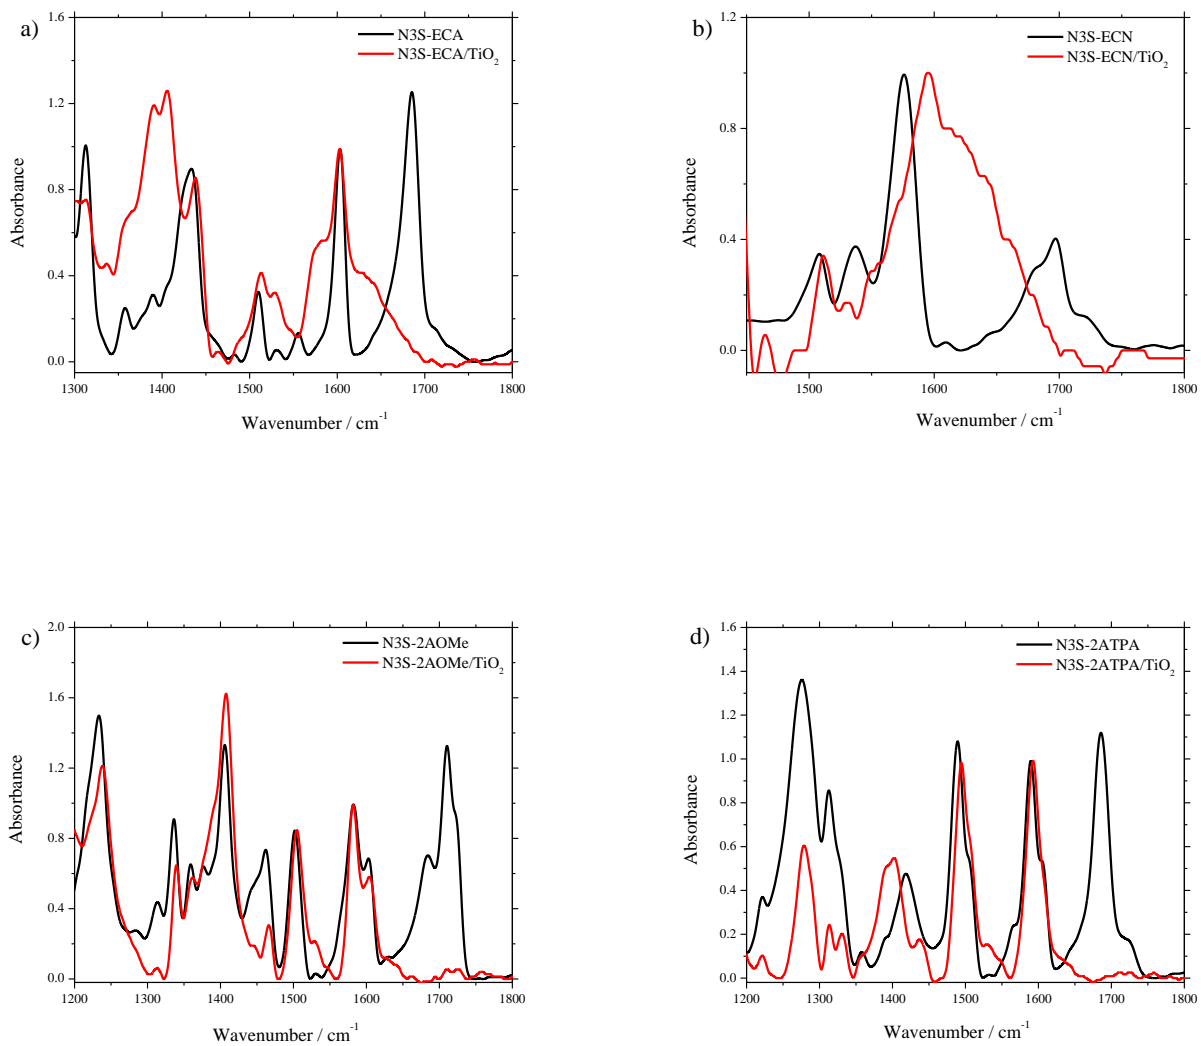

**Figure S1.** ATR-FTIR spectra of neat thiaporphyrins contrasted with thiaporphyrins on  $\text{TiO}_2$ . a) N3S-ECA, b) N3S-ECN, c) N3S-2AOMe, and d) N3S-2ATPA

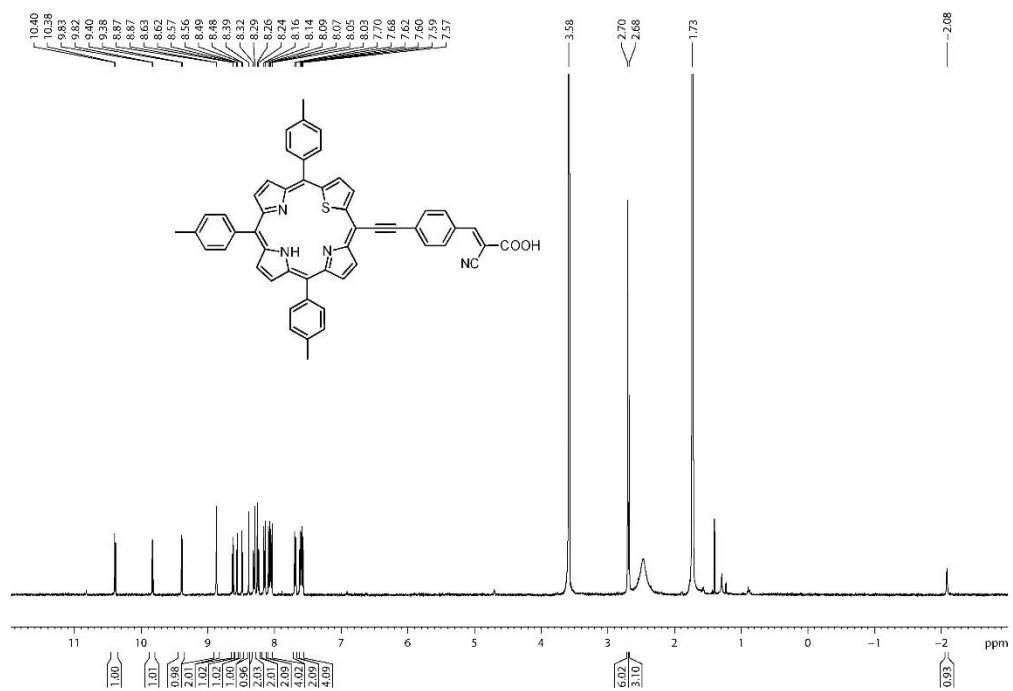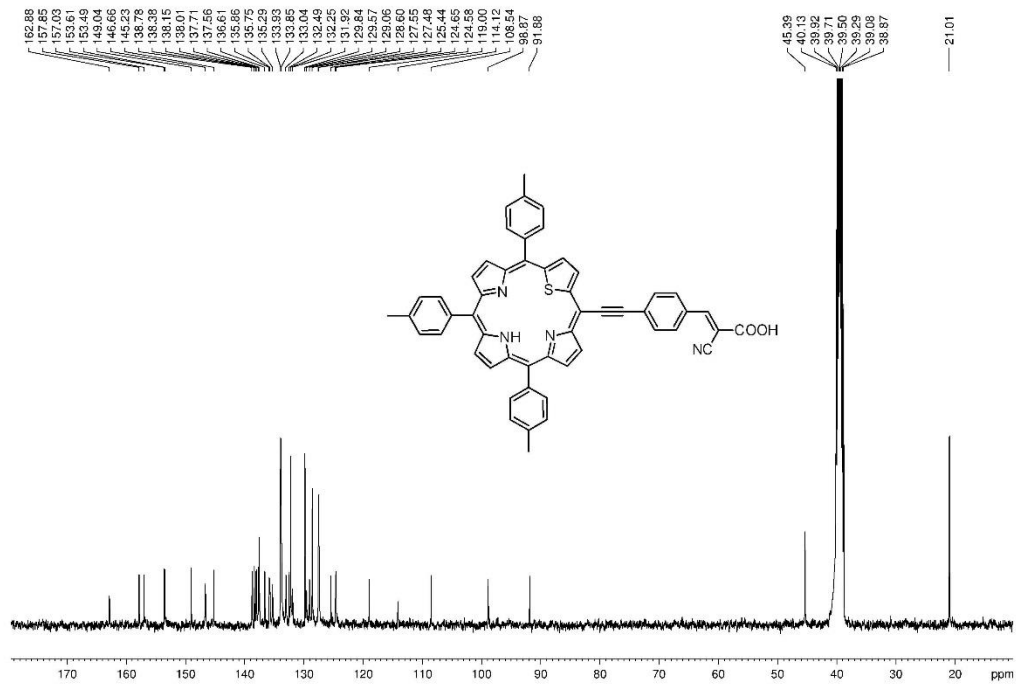

san211 (HR-ESI)

### Elemental Composition Report

#### Single Mass Analysis

Tolerance = 100.0 PPM / DBE: min = -1.5, max = 1000.0

Element prediction: Off

Number of isotope peaks used for i-FIT = 2

Monoisotopic Mass, Even Electron Ions

10 formula(e) evaluated with 1 results within limits (up to 100 closest results for each mass)

Elements Used:

C: 0-8000 H: 0-4000 N: 4-4 O: 2-2 S: 1-1

san211

0901\_san211 29 (2.857) Cm (29-100)

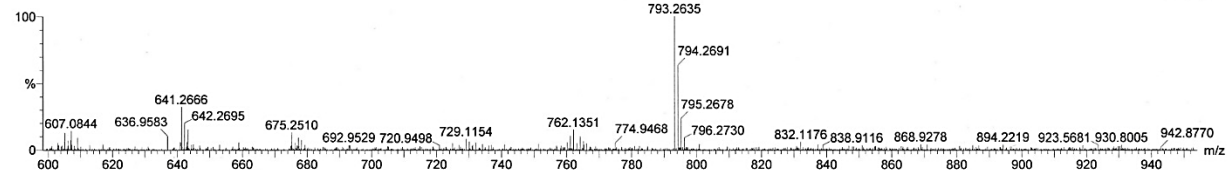

Minimum: -1.5  
Maximum: 5.0 100.0 1000.0

| Mass     | Calc. Mass | mDa  | PPM  | DBE  | i-FIT | i-FIT (Norm) | Formula         |
|----------|------------|------|------|------|-------|--------------|-----------------|
| 793.2635 | 793.2637   | -0.2 | -0.3 | 37.5 | 27.8  | 0.0          | C53 H37 N4 O2 S |

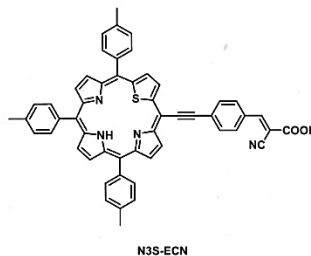

01-Sep-2010  
18:36:27  
1: TOF MS ES+  
5.91e+002

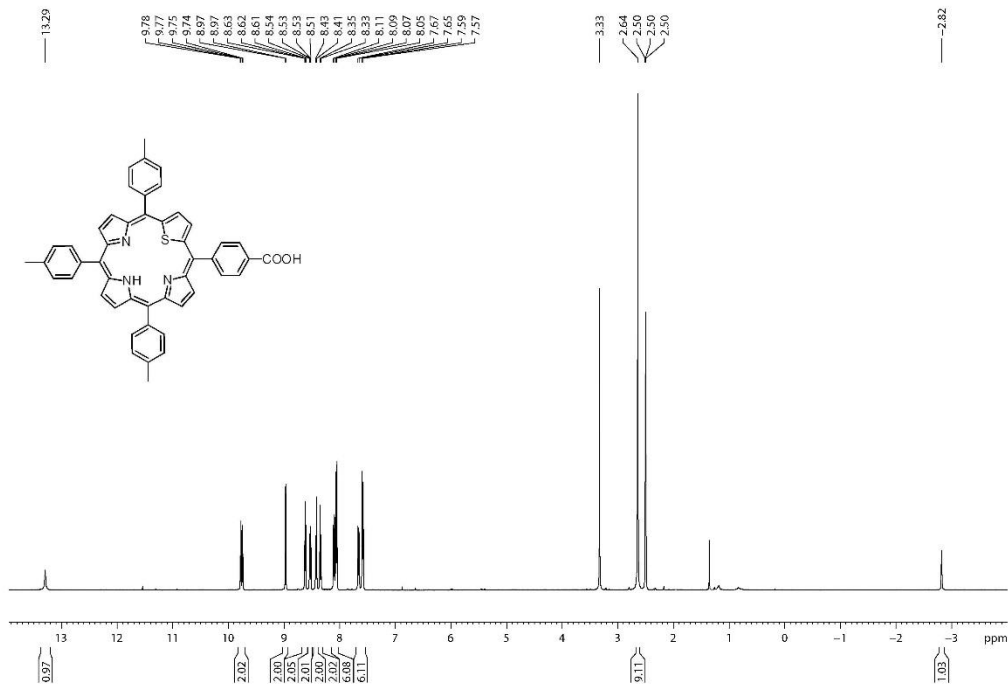

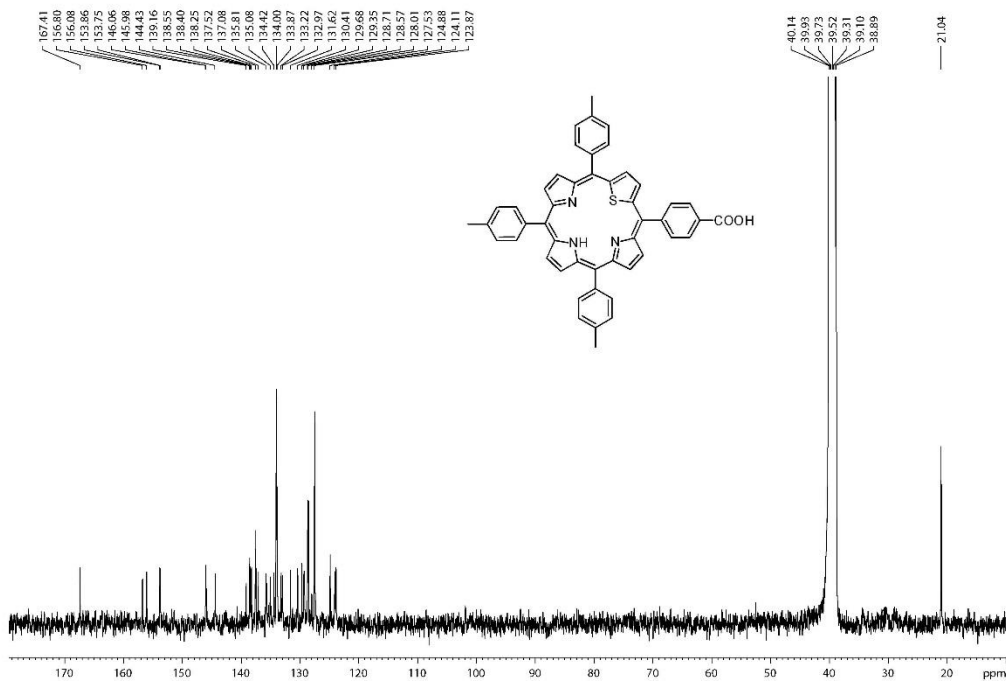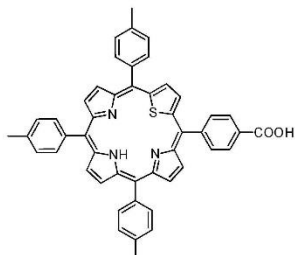

san-377 (HR-ESI)

Elemental Composition Report

Single Mass Analysis  
 Tolerance = 50.0 PPM / DBE: min = -100.0, max = 1000.0  
 Element prediction: Off  
 Number of isotope peaks used for i-FIT = 2

Monoisotopic Mass, Even Electron Ions  
 23 formula(e) evaluated with 1 results within limits (all results (up to 1000) for each mass)  
 Elements Used:  
 C: 0-400 H: 0-1000 N: 3-3 O: 2-2 S: 1-1  
 san-377

1016\_san-377 34 (1.897) Cm (34-1x10.000)

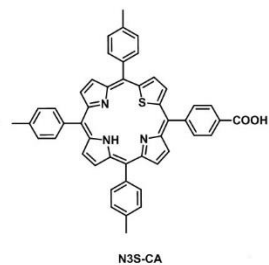

17-Oct-2012  
 11:20:49  
 1: TOF MS ES+  
 2.78e+003

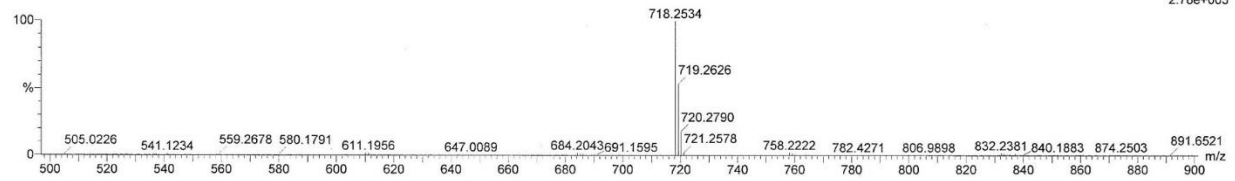

| Mass     | Calc. Mass | mDa | PPM | DBE  | i-FIT | i-FIT (Norm) | Formula                                                         |
|----------|------------|-----|-----|------|-------|--------------|-----------------------------------------------------------------|
| 718.2534 | 718.2528   | 0.6 | 0.8 | 32.5 | 35.5  | 0.0          | C <sub>48</sub> H <sub>36</sub> N <sub>3</sub> O <sub>2</sub> S |

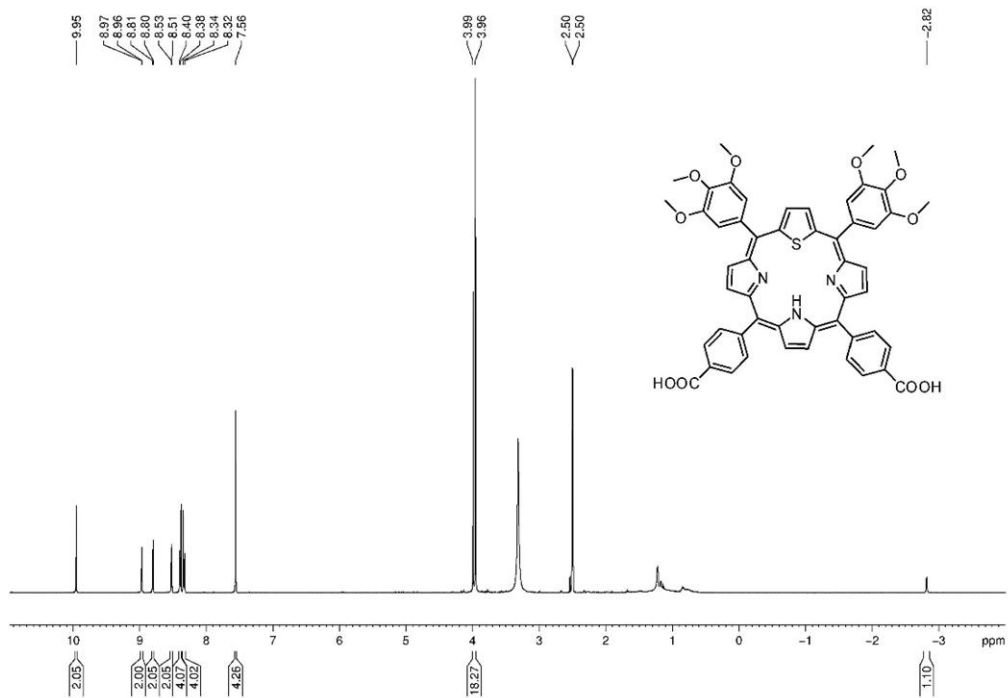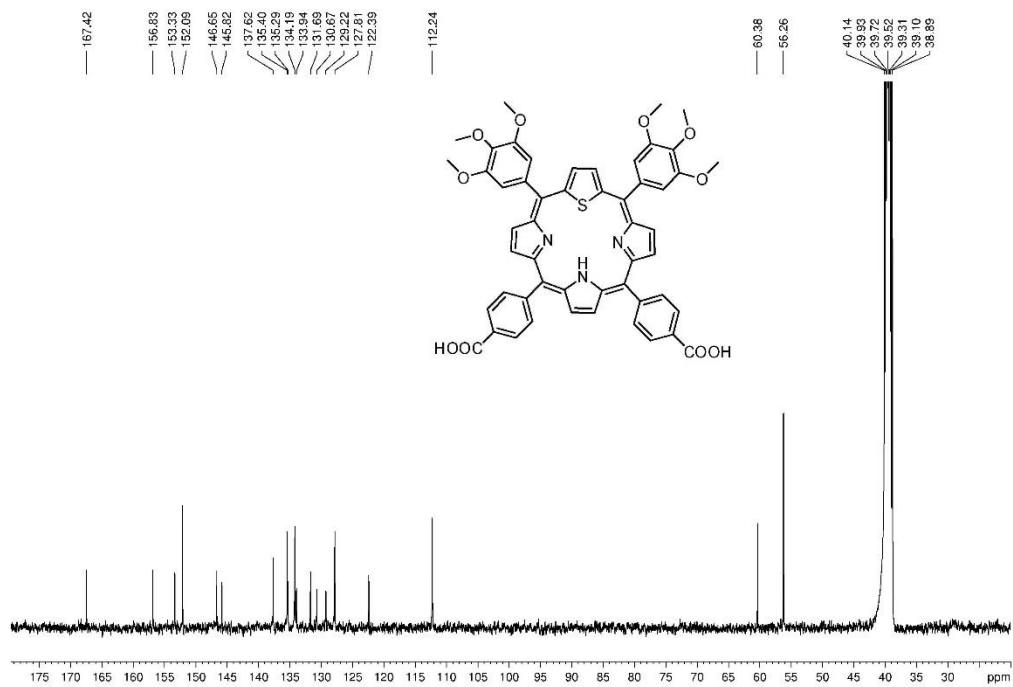

san-283 (HR-ESI)

### Elemental Composition Report

#### Single Mass Analysis

Tolerance = 50.0 PPM / DBE: min = -100.0, max = 1000.0  
Element prediction: Off  
Number of isotope peaks used for i-FIT = 2

Monoisotopic Mass, Even Electron Ions  
23 formula(e) evaluated with 1 results within limits (all results (up to 1000) for each mass)  
Elements Used:  
C: 0-400 H: 0-1000 N: 3-3 O: 10-10 S: 1-1  
san-283

1016\_san-283.95 (5.299)

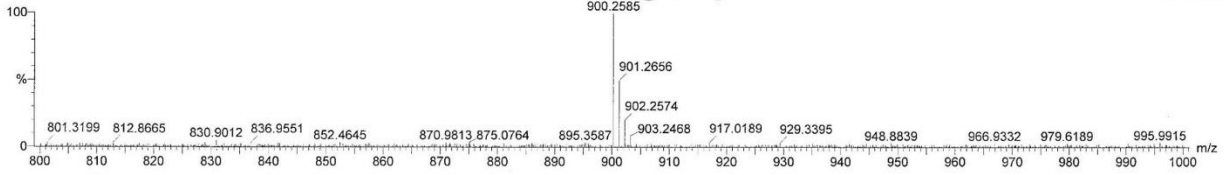

Minimum: -100.0  
Maximum: 50.0 50.0 1000.0

| Mass     | Calc. Mass | mDa  | PPM  | DBE  | i-FIT | i-FIT (Norm) | Formula          |
|----------|------------|------|------|------|-------|--------------|------------------|
| 900.2585 | 900.2591   | -0.6 | -0.7 | 33.5 | 19.6  | 0.0          | C52 H42 N3 O10 S |

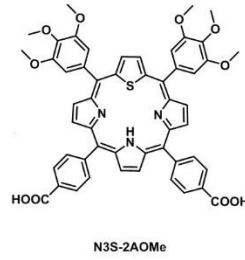

17-Oct-2012  
10:46:59  
1: TOF MS ES+  
1.84e+002

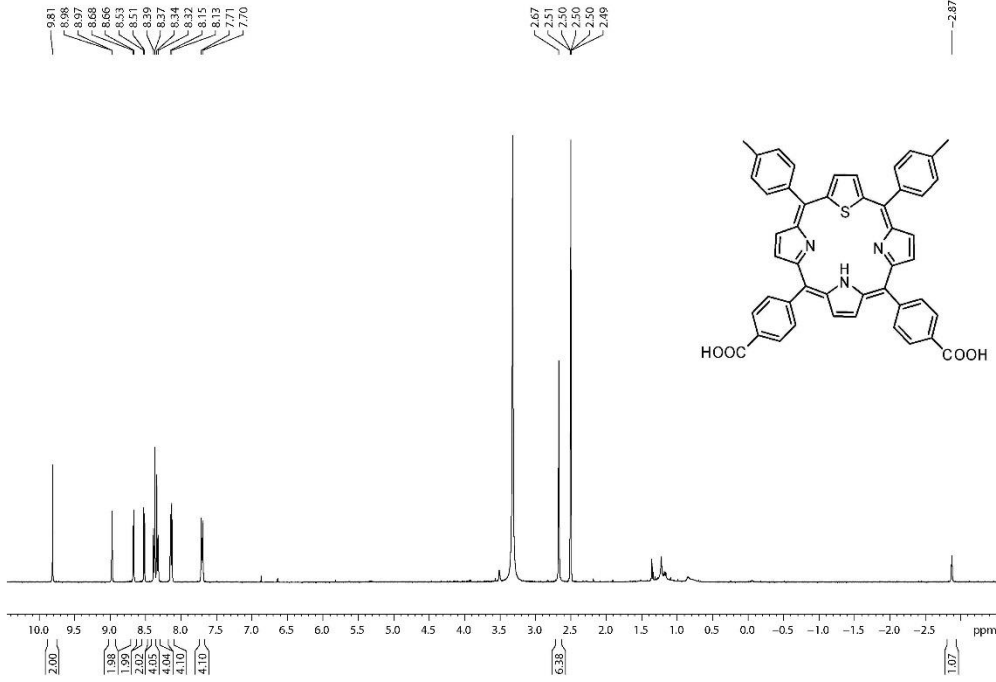



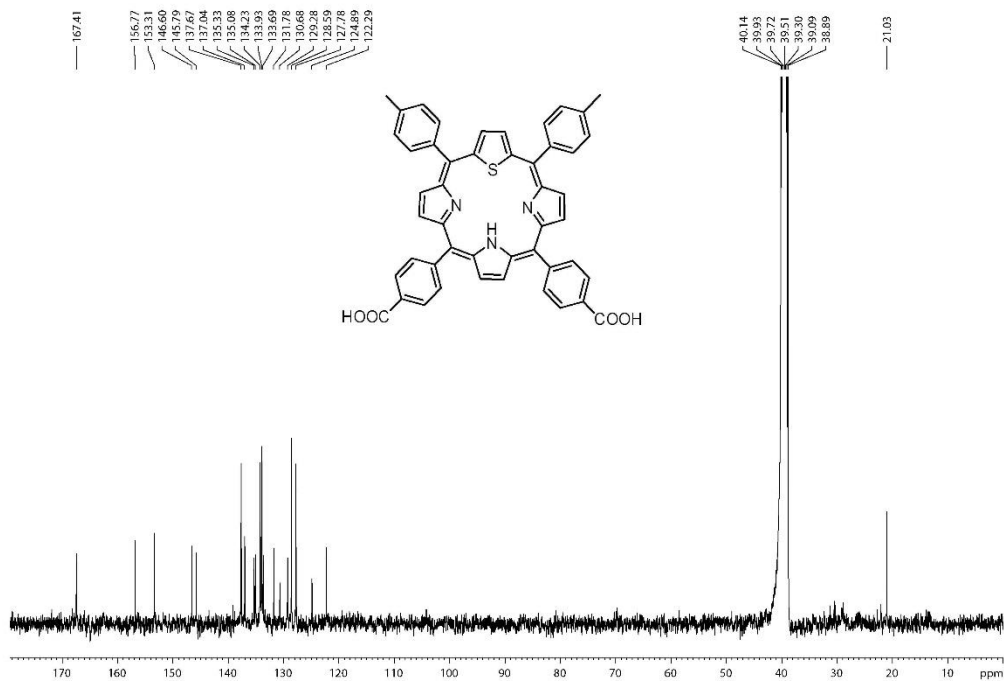

san411 (HR-ESI)

Elemental Composition Report

Single Mass Analysis

Tolerance = 20.0 PPM / DBE: min = -100.0, max = 1000.0  
 Element prediction: Off  
 Number of isotope peaks used for i-FIT = 2

Monoisotopic Mass, Even Electron Ions  
 22 formula(e) evaluated with 1 results within limits (all results (up to 1000) for each mass)  
 Elements Used:  
 C: 0-400 H: 0-1000 N: 3-3 O: 4-4 S: 1-1  
 san411

0912\_san411 20 (1.089)

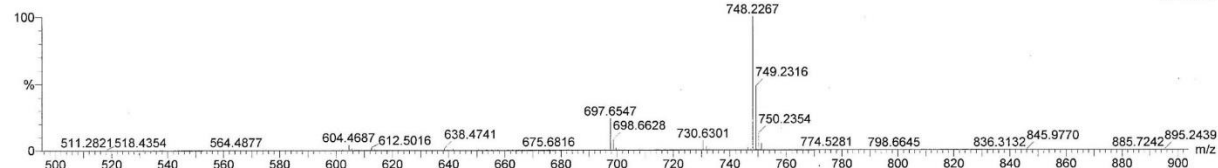

| Mass     | Calc. Mass | mDa  | PPM  | DBE  | i-FIT | i-FIT (Norm) | Formula         |
|----------|------------|------|------|------|-------|--------------|-----------------|
| 748.2267 | 748.2270   | -0.3 | -0.4 | 33.5 | 53.0  | 0.0          | C48 H34 N3 O4 S |

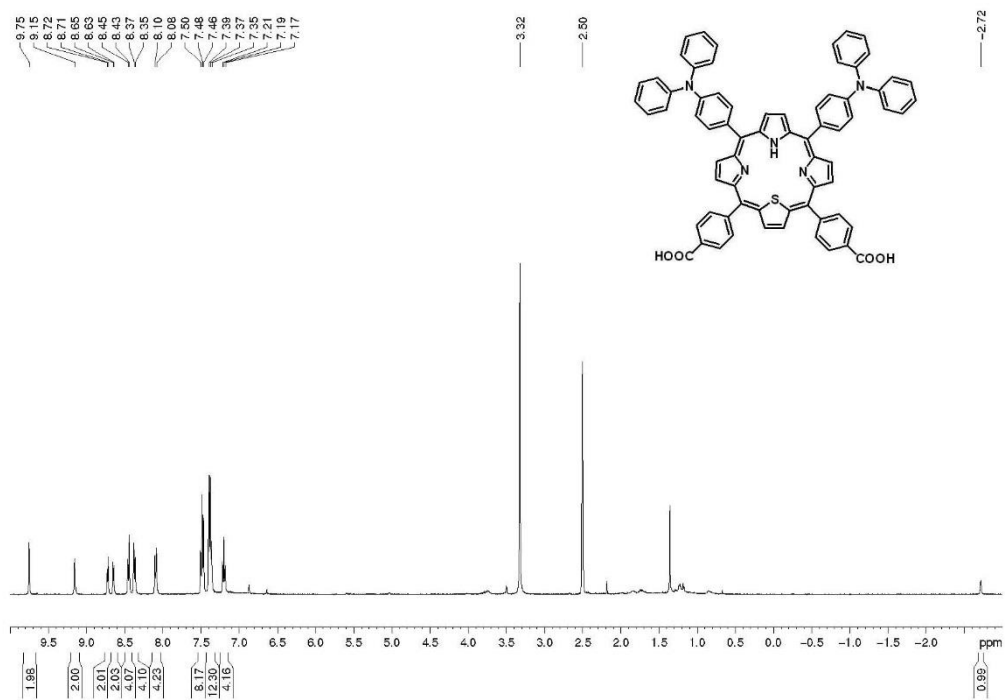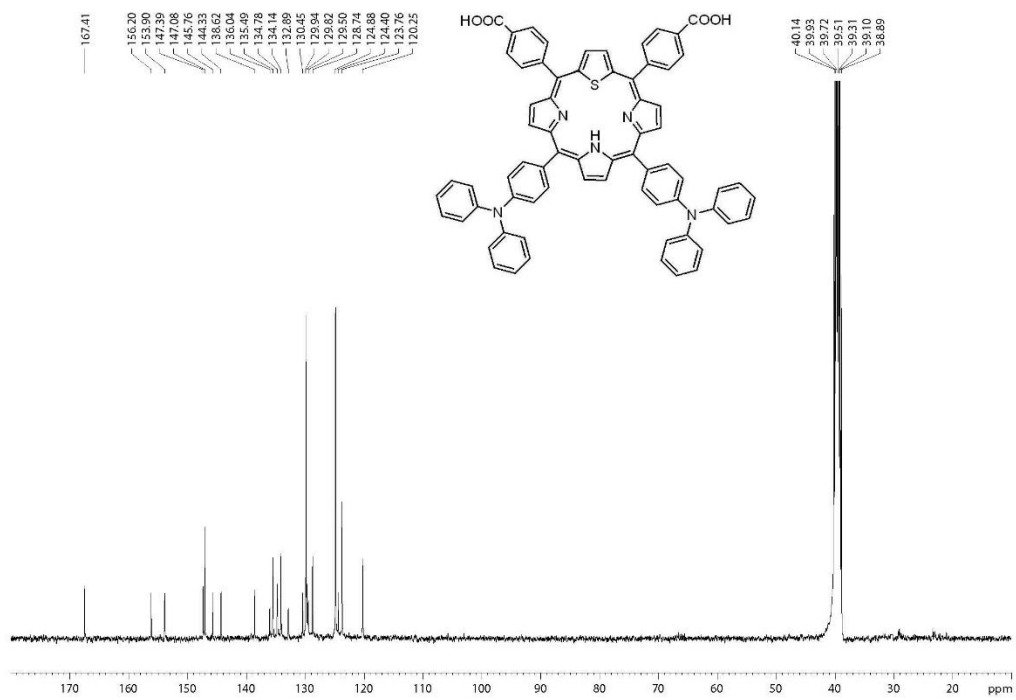

San 482 (HR-ESI)

### Elemental Composition Report

#### Single Mass Analysis

Tolerance = 20.0 PPM / DBE: min = -1.5, max = 1000.0

Element prediction: Off

Number of isotope peaks used for i-FIT = 2

Monoisotopic Mass, Even Electron Ions

12 formula(e) evaluated with 1 results within limits (all results (up to 1000) for each mass)

Elements Used:

C: 0-1000 H: 0-1000 N: 5-5 O: 4-4 S: 1-1

san 482

0930\_san 482 34 (1.896)

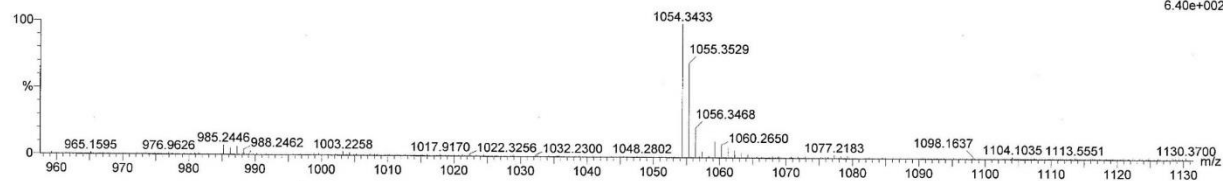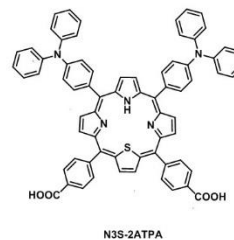

30-Sep-2013  
17:13:52  
1: TOF MS ES+  
6.40e+002

Minimum: -1.5  
Maximum: 5.0 20.0 1000.0

| Mass      | Calc. Mass | mDa | PPM | DBE  | i-FIT | i-FIT (Norm) | Formula         |
|-----------|------------|-----|-----|------|-------|--------------|-----------------|
| 1054.3433 | 1054.3427  | 0.6 | 0.6 | 49.5 | 23.0  | 0.0          | C70 H48 N5 O4 S |
